# Supplementary material
Source: Springer Nature journal article supplement (https://www.springermedizin.de/resource/supplementary/12889_2011_4413_MOESM5_ESM.pdf/9492542)

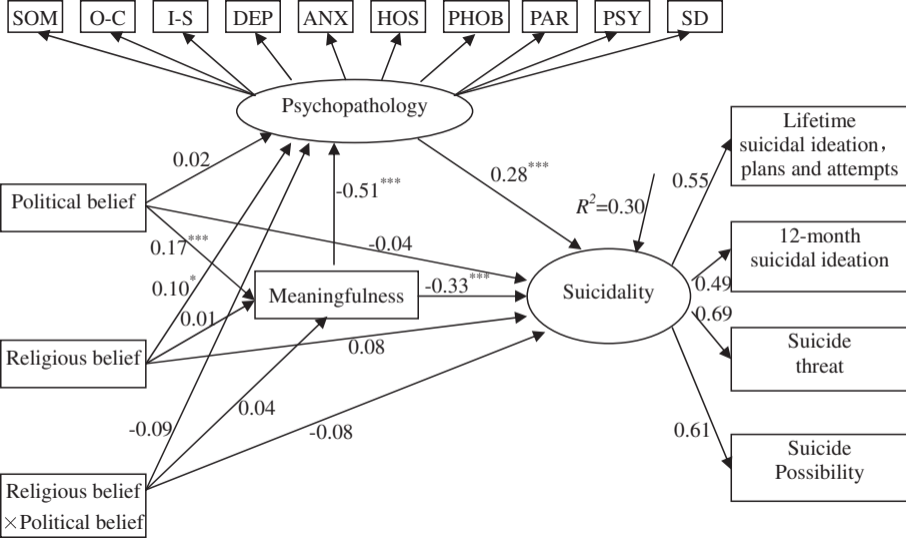

Supplement: MOESM5 [file 9492542]
